# Supplementary material
Source: PubMed Central journal article supplement (PMC3885907)
Supplement: NIHMS522914-supplement-Sarcoma_paper_supplement.pdf [file NIHMS522914-supplement-Sarcoma_paper_supplement.pdf]

Suppl. fig. 1  
Balkhi et al.

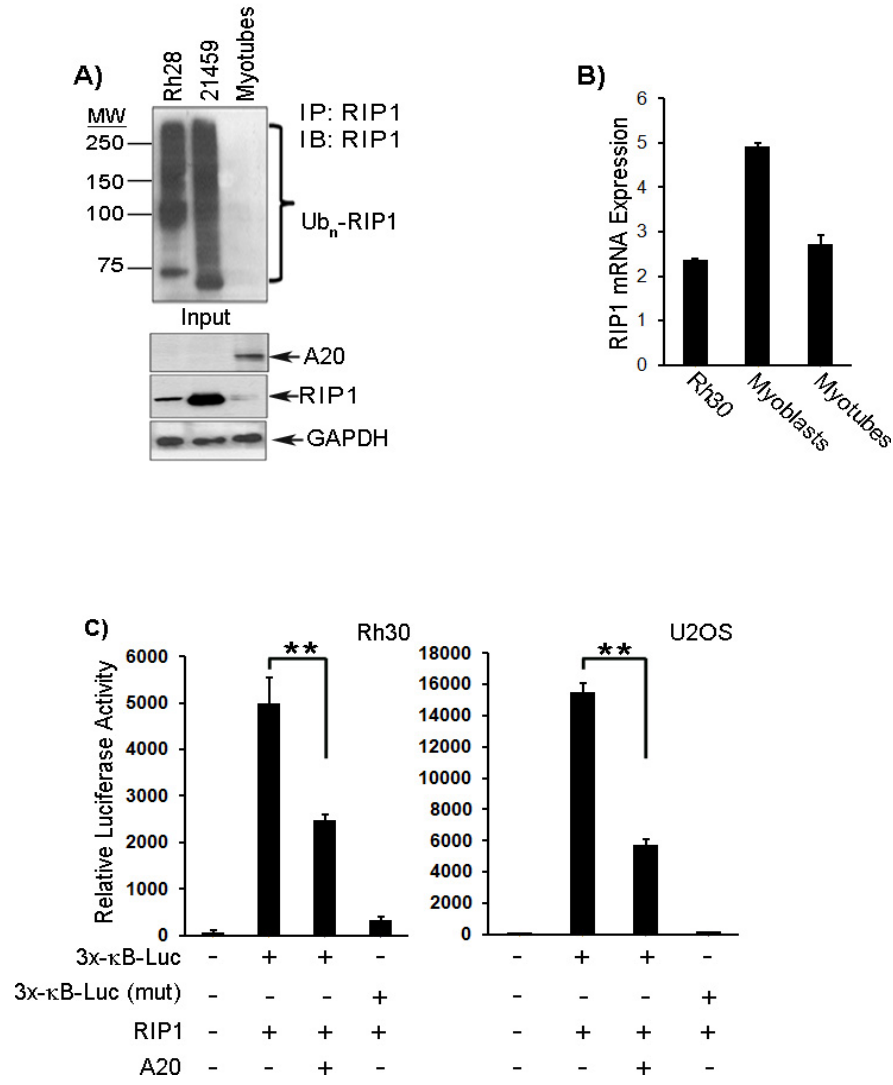

Suppl. fig. 2  
Balkhi et al.

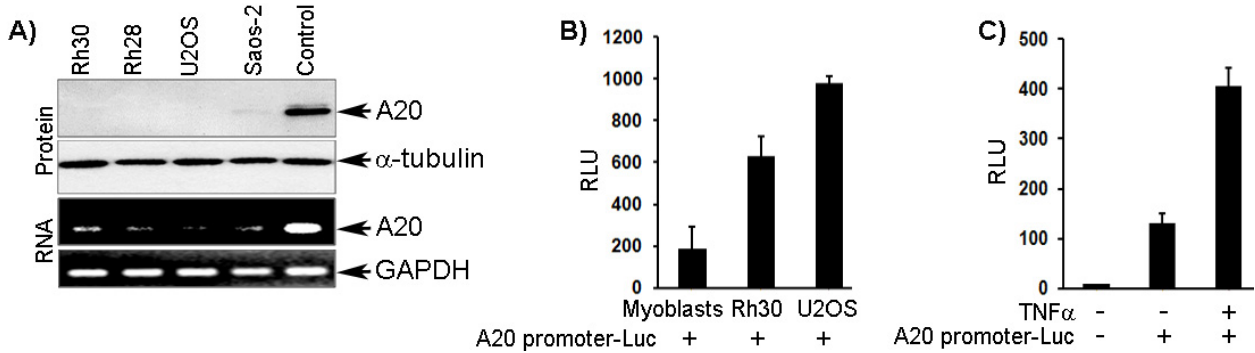

Suppl. fig. 3  
Balkhi et al.

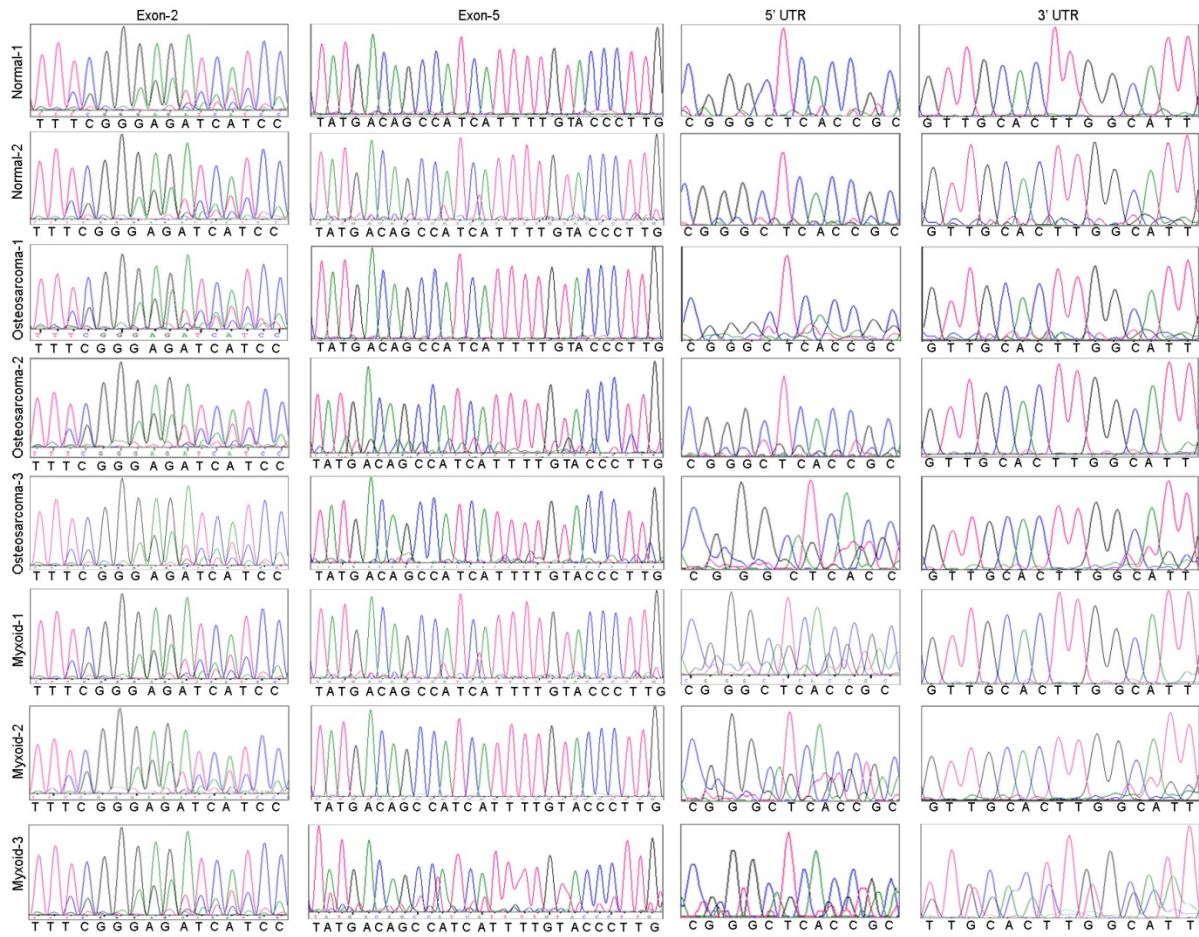

Suppl. fig. 4  
Balkhi et al.

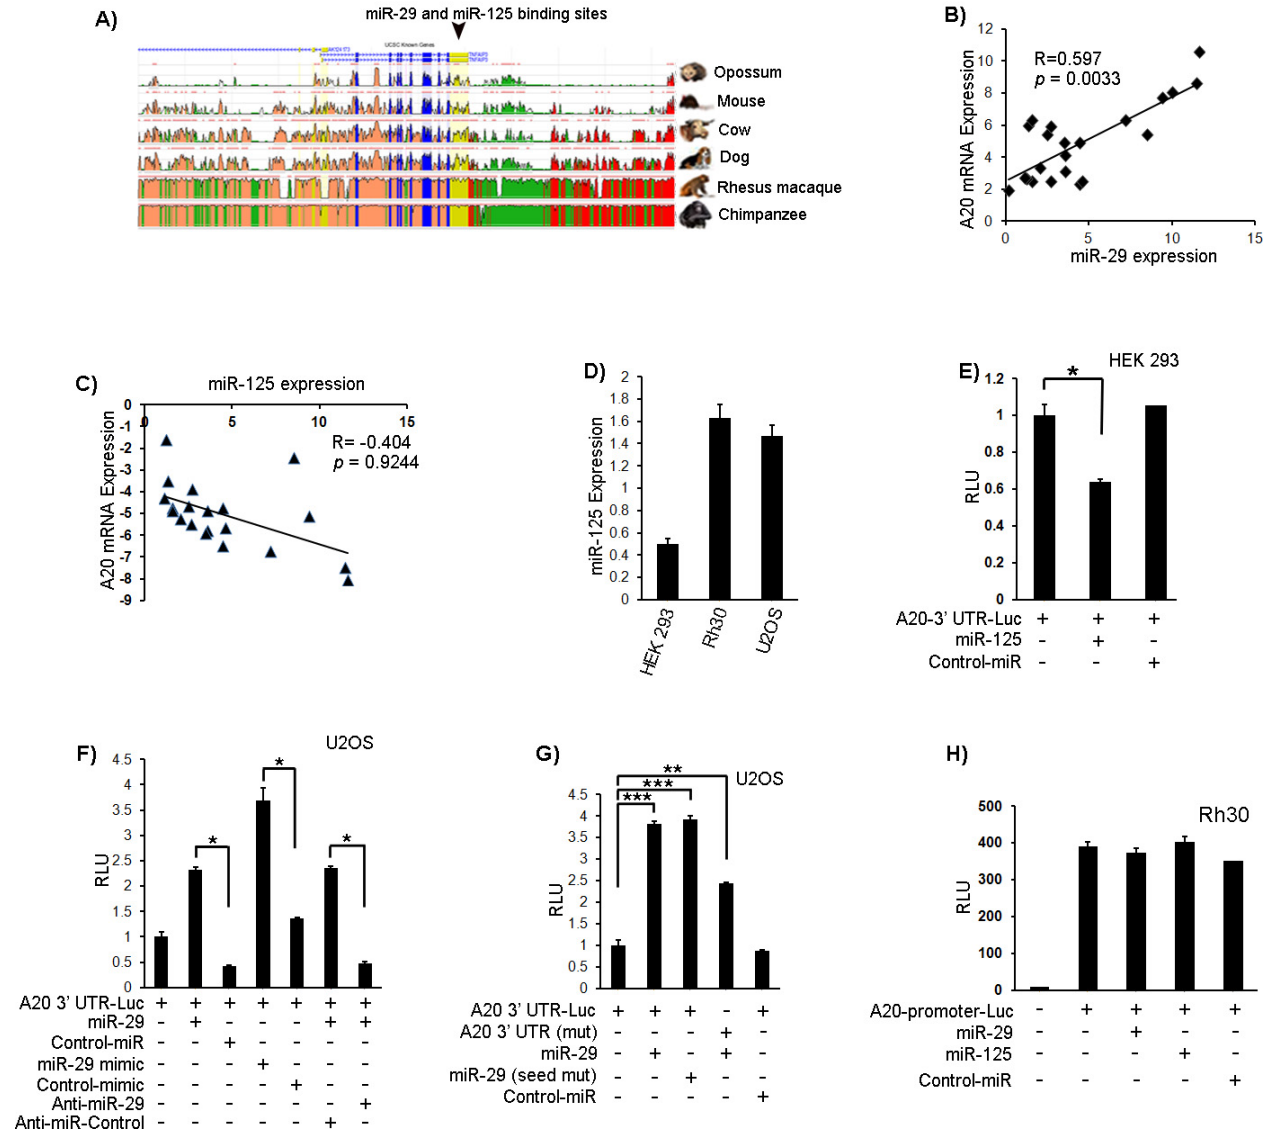

**Suppl. fig. 5**  
**Balkhi et al.**

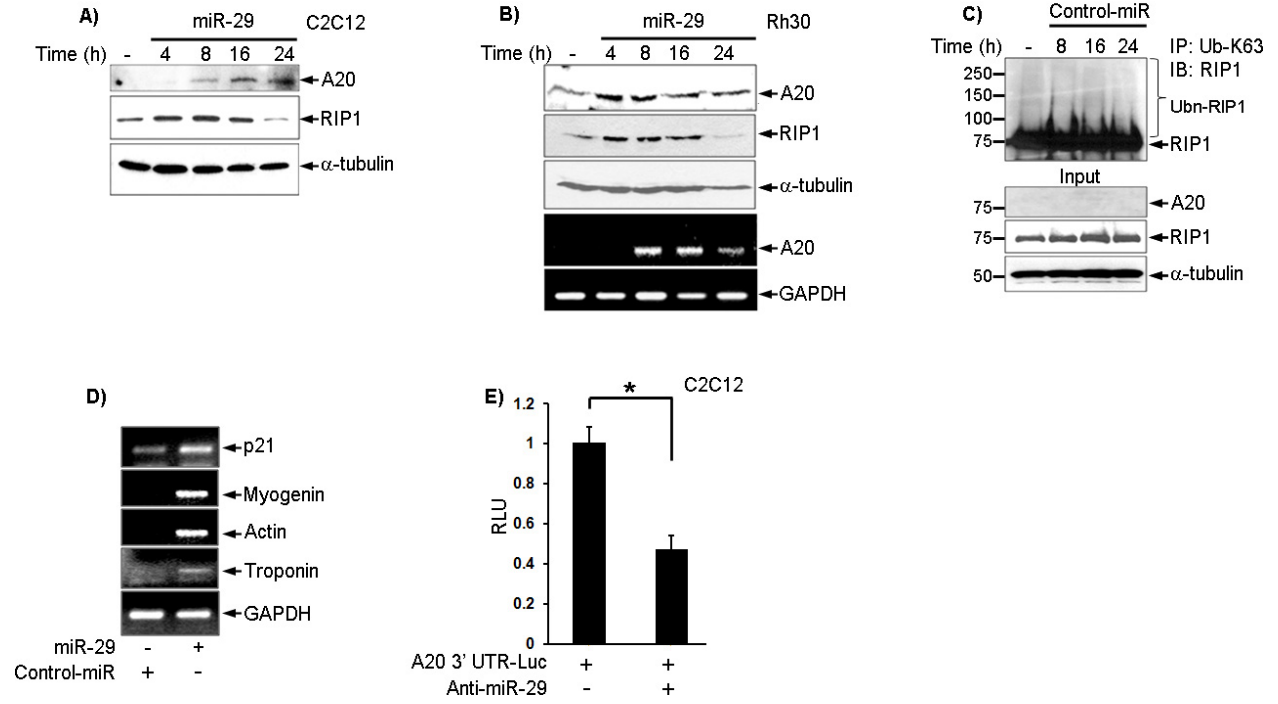

Suppl. fig. 6  
Balkhi et al.

A)

| ELAVL1: HuR |                |                        |       |     |                   |                               |
|-------------|----------------|------------------------|-------|-----|-------------------|-------------------------------|
| Score       | Relative Score | RBP Name               | Start | End | Matching sequence | Matrix ID                     |
| 4.40359056  | 100%           | <a href="#">ELAVL1</a> | 72    | 75  | GUUU              | <a href="#">1170_19561594</a> |
| 4.40359056  | 100%           | <a href="#">ELAVL1</a> | 14    | 17  | GUUU              | <a href="#">1170_19561594</a> |
| 4.1881759   | 90%            | <a href="#">SFRS1</a>  | 5     | 8   | UGGA              | <a href="#">1173_19561594</a> |
| 3.82636396  | 86%            | <a href="#">ELAVL1</a> | 33    | 36  | AUUU              | <a href="#">1170_19561594</a> |
| 3.82636396  | 86%            | <a href="#">ELAVL1</a> | 59    | 62  | AUUU              | <a href="#">1170_19561594</a> |

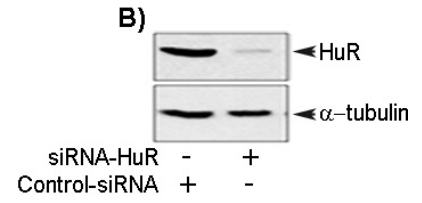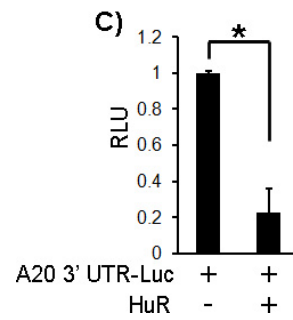

**Suppl. fig. 7**  
**Balkhi et al.**

**A) A20 3' UTR**

Locus: 3HSAR032466 Gene Name: TNFAIP3  
 Organism: Homo sapiens Length : 1993bp  
 Source Accessions: NM\_006290 Genomic location chr6:138244150-138246144:+

```

ccggaaacag gtgggtcacc tctgcaaga agtggggcct cgagctgtca
gtcatcatgggtgctatcctc tgaacccctc agctgccact gcaacagtgg gcttaagggt
gtctgagcaggagaggaag ataagctctt cgtggtgccc acgatgctca ggtttggtaa
cccgggagtggtcccagggtg gccttagaaa gcaaagcttg taactggcaa gggatgatgt
cagattcagcccaagggtcc tcctctccta ccaagcagga ggccaggaac ttctttggac
ttggaagggtgtcggggact ggccgaggcc cctgcaccct ggcgatcagg actgcttcat
cgtcttggtgtagaaagggga aaagacacac aagtcgctg ggttggagaa gccagagcca
ttccacctccccccccag catctctcag agatgtgaag ccagatcctc atggcagcga
ggccctcagcaagaagctca aggaagctca gggaaaatgg acgtattcag agagtgtttg
tagttcatggtttttcctca cctgccgggt tcctttcctg aggacccggc agaaatgcag
aacatccatggactgtgat tctgaggctg ctgagactga acatgttcac attgacagaa
aaacaagctgctctttataa tatgcacctt ttaaaaaatt agaatatttt actgggaaga
cgtgtaactcctttgggttat tactgtcttt acttctaag aagttagctt gaactgagga
gtaaaagtgtgtacatatat aatataccct tacattatgt atgagggatt tttttaatt
atattgaaatgctgccctag aagtacaata ggaaggctaa ataataataa cctgtttttct
ggttgttgttggggcatgag cttgtgtata cactgcttgc ataaactcaa ccagctgcct
ttttaaaggagctctagtc cttttgtgt aattcacttt atttatttta ttacaaactt
caagattatttaaggtgaaga tatttcttca gctctgggga aaatgccaca gtgttctcct
gagagaacatccttgctttg agtcaggctg tgggcaagtt cctgaccaca gggagtaaat
tggcctcctttgatacacttt tgcttgccct cccaggaaag aaggaattgc atccaaggta
tacatacatattcatcgatg tttcggtgctt ctccttatga aactccagct atgtaataaa
aaactatactctgtgttctg ttaatgcctc tgagtgtcct acctccttgg agatgagata
gggaaggagcagggatgaga ctggcaatgg tcacagggaa agatgtggcc tttgtgatg
gttttatttttctgttaacac tgtgtcctgg ggggctggg aagtcccctg catcccattg
taccctggatttgggacagc aaaagccagt aaccatgagt atgaggaat ctctttctgt
tgctggcttacagtttctct gtgtgctttg tggttgctgt catattttgct ctagaagaaa
aaaaaaaaaggaggggaaat gcattttccc cagagataaa ggctgccatt ttgggggtct
gtacttatggcctgaaaata tttgtgatcc ataactctac acagccttta ctcatactat
taggcacactttccccttag agccccctaa gtttttccca gacgaatctt tataatttct
ttccaaagataccaataaaa cttcagtgtt ttcatctaata tctcttaaag ttgatatctt
aatattttgtgttgcatt atttccattc ttaatgtgaa aaaaagtaat tattttact
tattataaaaagtatttgaa atttgcacat ttaattgtcc ctaatagaaa gccacatt
ctttgttggatttcttcaag tttttctaaa taaatgtaac ttttcacaag agtcaacatt
aaaaaaaaaattattttaaga aca
  
```

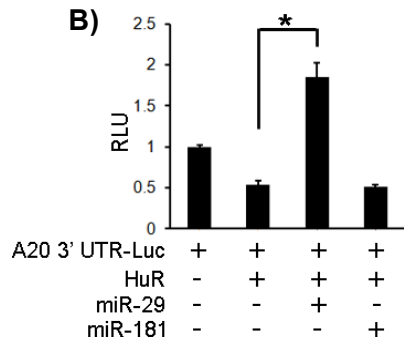





**Suppl. Tables**  
**Balkhi et al.**

**Table 1**

| Primer Pair | Sequence (5'-3')          |
|-------------|---------------------------|
| A20 Δ1      | GAATCTTTATAATTTCTTTCCAAAG |
|             | CTTTGGAAAGAAATTATAAAGATTC |
| A20 Δ2      | GATGTGGCCTTTTGTGATGG      |
|             | CCATCACAAAAGGCCACATC      |
| A20 Δ3      | GTGAAGATATTTCTTCAGCTCTG   |
|             | CAGAGCTGAAGAAATATCTTCAC   |
| A20 Δ4      | GAATATTTTACTGGGAAGACG     |
|             | CGTCTTCCCAGTAAAATATTC     |
| A20 Δ5      | GACACACAAGTCGCGTGGGTTG    |
|             | CAACCCACGCGACTTGTGTGTC    |
| A20 Δ6      | GCTGCCACTGCAACAGTGG       |
|             | CCACTGTTGCAGTGGCAGC       |

**Table 2**

|                          |                                                           |
|--------------------------|-----------------------------------------------------------|
| A20 exon 2<br>A20 exon 2 | F GGAGTCGTATTAAGTCAGGCTAA<br>R GGCAAAAAGAAACACAACAGAAC    |
| A20 exon 5<br>A20 exon 5 | F ACCTAAGGGCCTCATTTTCC-3'<br>R AGCAAAAAGGAAAACCCTGA-3'    |
| A20 5' UTR<br>A20 5' UTR | F CGAGCGAGCCCGACCCAGG<br>R CCCTTGACTGCGGTGAGCCCG          |
| A20 3' UTR<br>A20 3' UTR | F1 GGCAATGCCAAGTGCAACGGC<br>R1 GCTTCTCCAACCCACGCGAC       |
| A20 3' UTR<br>A20 3' UTR | F2 GCGCATCAGGACTGCTTCATCGTC<br>R2 GTA CT TCTAGGGCAGCATTTC |
| A20 3' UTR<br>A20 3' UTR | F3 CTGAGGAGTAAAAGTGTGTAC<br>R3 CCCCAGGACACAGTGTTAAC       |
| A20 3' UTR<br>A20 3' UTR | F4 GAAAGATGTGGCCTTTTGTG<br>R4 CTTTTTCTTTCAGCATTTCATC      |

**Table 3**

|                           |        |                                                 |
|---------------------------|--------|-------------------------------------------------|
| †Mouse A20<br>Mouse A20   | F<br>R | TGTGGGGTGTTCAGGATACTG<br>GTTCCGAGTGTCTGTCTCCTTA |
| †Mouse RIP1<br>Mouse RIP1 | F<br>R | GATCGCAGTGTGCAGGCTAA<br>GCTGCGGTTTTGTCTGTTTC    |
| Mouse A20<br>Mouse A20    | F<br>R | GTGACCCTGAAGGACAGTGG<br>GAAAAAGGCTGGGTGCTGTG    |
| Mouse RIP1<br>Mouse RIP1  | F<br>R | ATCATCAGCCTCATGGAGCG<br>ATTCCACGACTCGTTGTGCT    |

†Symbol denotes the primers used for qRT-PCR

**Table 4**

|                 |                                                                                                                             |
|-----------------|-----------------------------------------------------------------------------------------------------------------------------|
| miR-29 vector 1 | 5-<br>ggatccCTTCTGGAAGCTGGTTTCACATGGTGGCTTAGATTTTTCCATCTTTGTATCTAGCACCATTTG<br>AAATCAGTGTTTTAGGAGcttaag-3                   |
| miR-29 vector 2 | <b>5-</b><br>ggatccCTTCTGGAAGCTGG <u>ccc</u> CACATGGTGGCTTAGATTTTTCCATCTTTGTATCTAGCACCATTTGA<br>AATCAGTGTTTTAGGAGcttaag-3   |
| miR-29 vector 3 | 5-<br>ggatccCTTCTGGAAGCTGGTTTCACATGGTGGCTTAGATTTTTCCATCTTTGTATCTAGCACC <u>ccc</u> GA<br>AATCAGTGTTTTAGGAGcttaag-3'          |
| miR-29 vector 4 | 5-<br>ggatccCTTCTGGAAGCTGG <u>ccc</u> CACATGGTGGCTTAGATTTTTCCATCTTTGTATCTAGCACC <u>ccc</u> GA<br>AATCAGTGTTTTAGGAGcttaag-3' |

Underlined letters denote mutated HuR sites.
